# Supplementary material
Source: Research Square preprint supplement (doi:10.21203/rs.3.rs-9448195/v1)
Supplement: Supplementary file 1 [file fdb59c0a7d8f5dab6929eb7d.docx]

**Appendix**

**Additional Therapeutic Modalities Reported by Participants**

| **Modality** | **n** | **%** |
| --- | --- | --- |
| Attachment-Informed Therapy | 1 | 5.3 |
| Conscious Connected Breathwork | 1 | 5.3 |
| Compassion-Focused Therapy | 1 | 5.3 |
| Coherence Therapy Approaches | 1 | 5.3 |
| Dialectal Behavioural Therapy | 1 | 5.3 |
| Emotion-Focused Therapy | 1 | 5.3 |
| Existential Analysis | 1 | 5.3 |
| Existential Therapy | 1 | 5.3 |
| Experiential Therapy | 1 | 5.3 |
| Focusing | 1 | 5.3 |
| Functional Breathwork | 1 | 5.3 |
| Gestalt | 1 | 5.3 |
| Hypno-Psychotherapy | 1 | 5.3 |
| Mindfulness-Based Cognitive Therapy | 1 | 5.3 |
| Meditation | 1 | 5.3 |
| Psychoanalytic Therapy | 1 | 5.3 |
| Psychosynthesis | 1 | 5.3 |
| Psychosexual Therapy | 1 | 5.3 |
| Schema Therapy | 1 | 5.3 |
| Somatic-Relational Therapy | 1 | 5.3 |
| Structural Dissociation Parts Work | 1 | 5.3 |
| Systemic Therapy | 1 | 5.3 |
| Transactional Analysis | 1 | 5.3 |
| Yoga | 1 | 5.3 |

**Extended Reflexivity Statement**

***Personal and professional positioning***

The lead author approached this research with a strong interest in both psychotherapy and psychedelic substances. As a trainee therapist, and having personally experienced therapy as a meaningful vehicle for growth and relief from mental health challenges, the lead author was predisposed to view psychotherapy positively. Throughout the interviews, the lead author found a particular affinity with humanistic and existential approaches, which aligned with their own interests. However, this potential bias was mitigated by the study’s cross-modality focus, as data related to specific therapeutic modalities was excluded from coding in order to remain consistent with the study’s research aims.

Similarly, the lead author has a broadly positive view of psychedelics’ therapeutic potential. However, experience in harm reduction and welfare settings, alongside witnessing someone close experience ontological shock, underscored the importance of improving understanding of how such experiences can be effectively supported. Collectively, these experiences shaped the lens brought to the research - one that recognises the therapeutic potential of psychedelics while remaining attentive to their complexities, risks, and varied outcomes.

***Analytic reflexivity***

The analysis was also shaped by the lead author’s positionality, as interpretive decisions were inevitable given the size and scope of the dataset. To minimise the privileging of themes aligned with the researcher’s interests, a broad coding approach was adopted across both semantic and latent levels. This strategy aimed to ensure that all meaning-rich data segments relevant to the research question were included in the analysis. Regular comparison across the dataset was also undertaken to ensure that emerging themes were grounded in multiple participant accounts, rather than being influenced by researcher preference.
